# Supplementary material
Source: publisher figshare collection journal article supplement (https://acs.figshare.com/ndownloader/files/3739336)
Supplement: Supplementary file 1 [file 3739336]

## Supporting Information

### **Mesoporous Silica Nanoparticles with pH – Sensitive Nanovalves for Delivery of Moxifloxacin Provide Improved Treatment of Lethal Pneumonic Tularemia**

*Zilu Li<sup>1,3,#</sup>, Daniel L. Clemens<sup>2,#</sup>, Bai-Yu Lee<sup>2,#</sup>, Barbara Jane Dillon<sup>2</sup>, Marcus A. Horwitz<sup>2,\*</sup>, Jeffrey I. Zink<sup>3,4,\*</sup>*

<sup>1</sup>Department of Materials Science and Engineering

<sup>2</sup>Division of Infectious Diseases, Department of Medicine

<sup>3</sup>Department of Chemistry & Biochemistry

<sup>4</sup>California NanoSystems Institute,

University of California, Los Angeles, California, USA

<sup>#</sup> Z. Li, D. L. Clemens, and B.-Y. Lee contributed equally

Address correspondence to Marcus A. Horwitz, Dept. of Medicine, CHS 37-121,

UCLA School of Medicine, 10833 Le Conte Ave., Los Angeles, CA 90095-1688,

USA. Phone: (310) 206-0074; Fax: (310) 794-7156; E-mail:

[mhorwitz@mednet.ucla.edu](mailto:mhorwitz@mednet.ucla.edu) or to Jeffrey I. Zink, Dept. of Chemistry and

Biochemistry, UCLA, 3013 Young Dr. East, Los Angeles, CA 90095-1569, USA.

Phone: (310) 825-1001; Fax: (310) 825-4911; E-mail: [jiz@chem.ucla.edu](mailto:jiz@chem.ucla.edu).

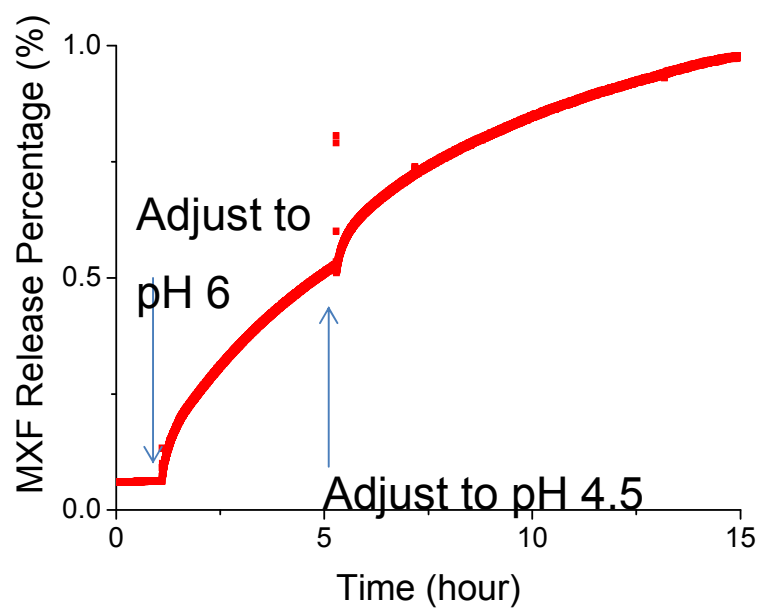

**Figure S1.** MSN-MBI-MXF release profile. There is no leakage at pH 7 evidenced by the flat baseline. Drug release starts at when the pH is lower than 6. The release rate can be further increased by lowering pH to 4.5.

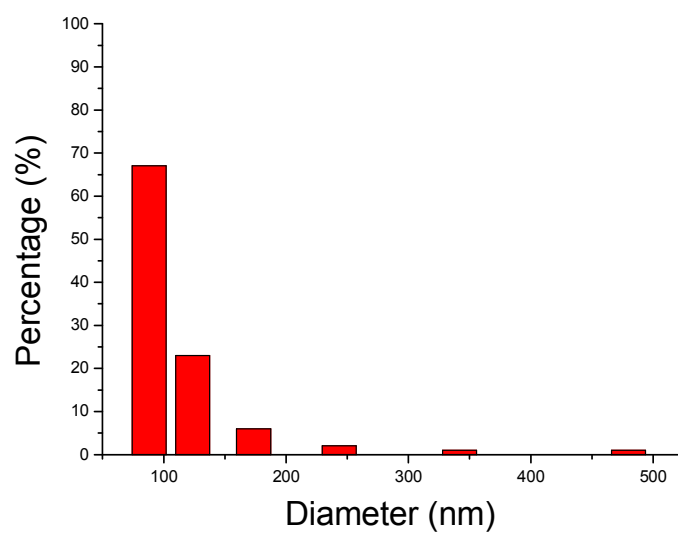

**Figure S2.** Dynamic light scattering (DLS) measurement of MSN with pH sensitive nanovalve. The mean hydrodynamic diameter of the modified nanoparticle is around 100 nm.

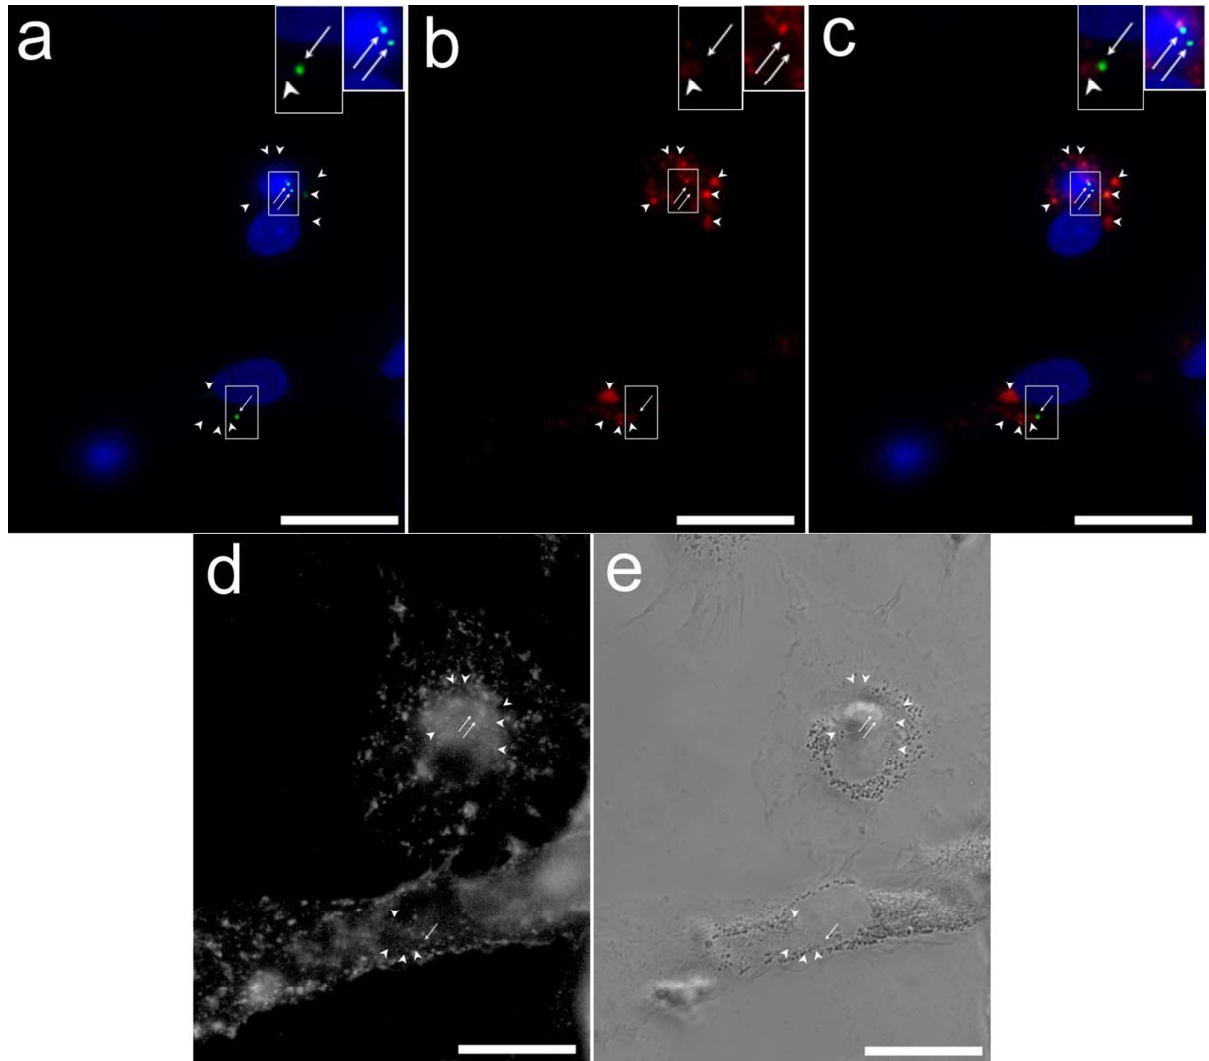

**Figure S3.** Epifluorescence and phase contrast microscopy demonstrates uptake of RITC-labeled MSN-MBI by *F. tularensis*-infected human monocyte derived macrophages (MDM). Human MDM cells were infected with GFP-expressing *F. tularensis* for 90 min, washed, and incubated with 12.5  $\mu\text{g/mL}$  of RITC-labeled 100 nm MSN-MBI. After 3 hours, the cells were washed; the plasma membrane was stained with WGA-AlexaFluor 633; the cells were fixed; and nuclei were stained with DAPI. (a) LVS-GFP (green, arrows) and DAPI-stained nucleus (blue); (b) RITC-labeled MSN-MBI (red, arrowheads); (c) merged red, green, and blue color

image; (d) contours of the cell are stained with WGA-AlexaFluor 633 (gray scale); (e) phase contrast image. Scale bars, 10  $\mu\text{m}$ . Boxed areas with arrows indicating locations of green fluorescent bacteria are shown at 2-fold higher magnification in the insets in the upper right of panels (a) – (c). The two bacteria overlying the DAPI stained nucleus appear turquoise rather than green because of merging of the blue and green channels. The experiment was done twice with similar results.

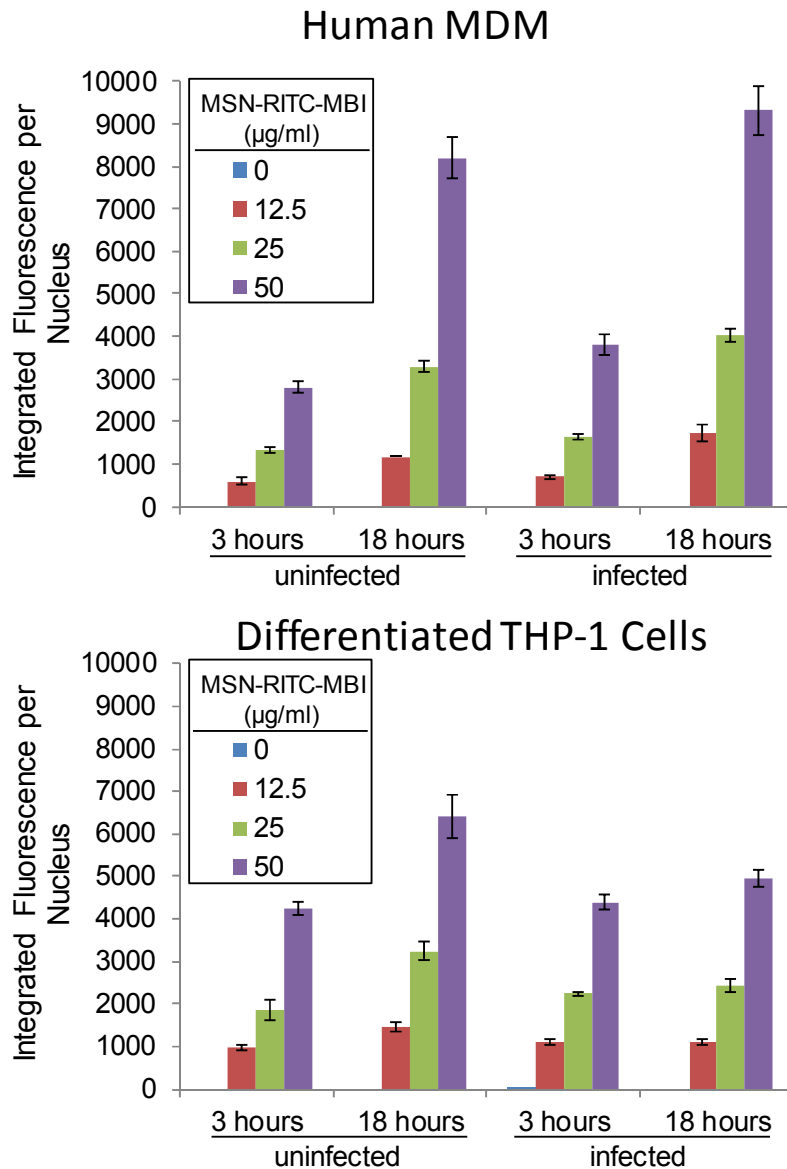

**Figure S4.** Quantitation of uptake of MSN-RITC-MBI by infected and uninfected human MDM and differentiated THP-1 cells. Uninfected or LVS-GFP infected human MDM (top panel) or THP-1 cells (bottom panel) were incubated with 0, 12.5, 25, or 50 µg/ml of MSN-RITC-MBI for 3 hours or 18 hours prior to staining and fixation as described in Figure S3. Automated high content imaging was performed with an ImageXpress robotic fluorescence microscope and MSN-RITC-MBI

integrated fluorescence intensity per DAPI-stained nucleus was quantitated using the granularity module of MetaXpress software. Data shown represent the means  $\pm$  S.E. of duplicate wells (Human MDM) or of quadruplicate wells (THP-1 cells). The experiment was performed twice with similar results.

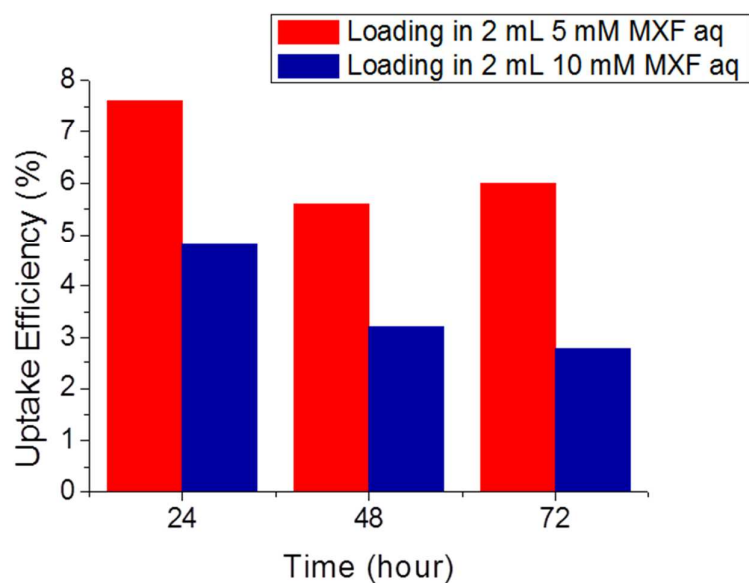

**Figure S5.** Uptake efficiency of MSN-MBI-MXF loading with 5 mM and 10 mM MXF aqueous solution for 24, 48 and 72 hours. 24 hours loading yielded the highest uptake efficiency for both low and high MXF concentrations.



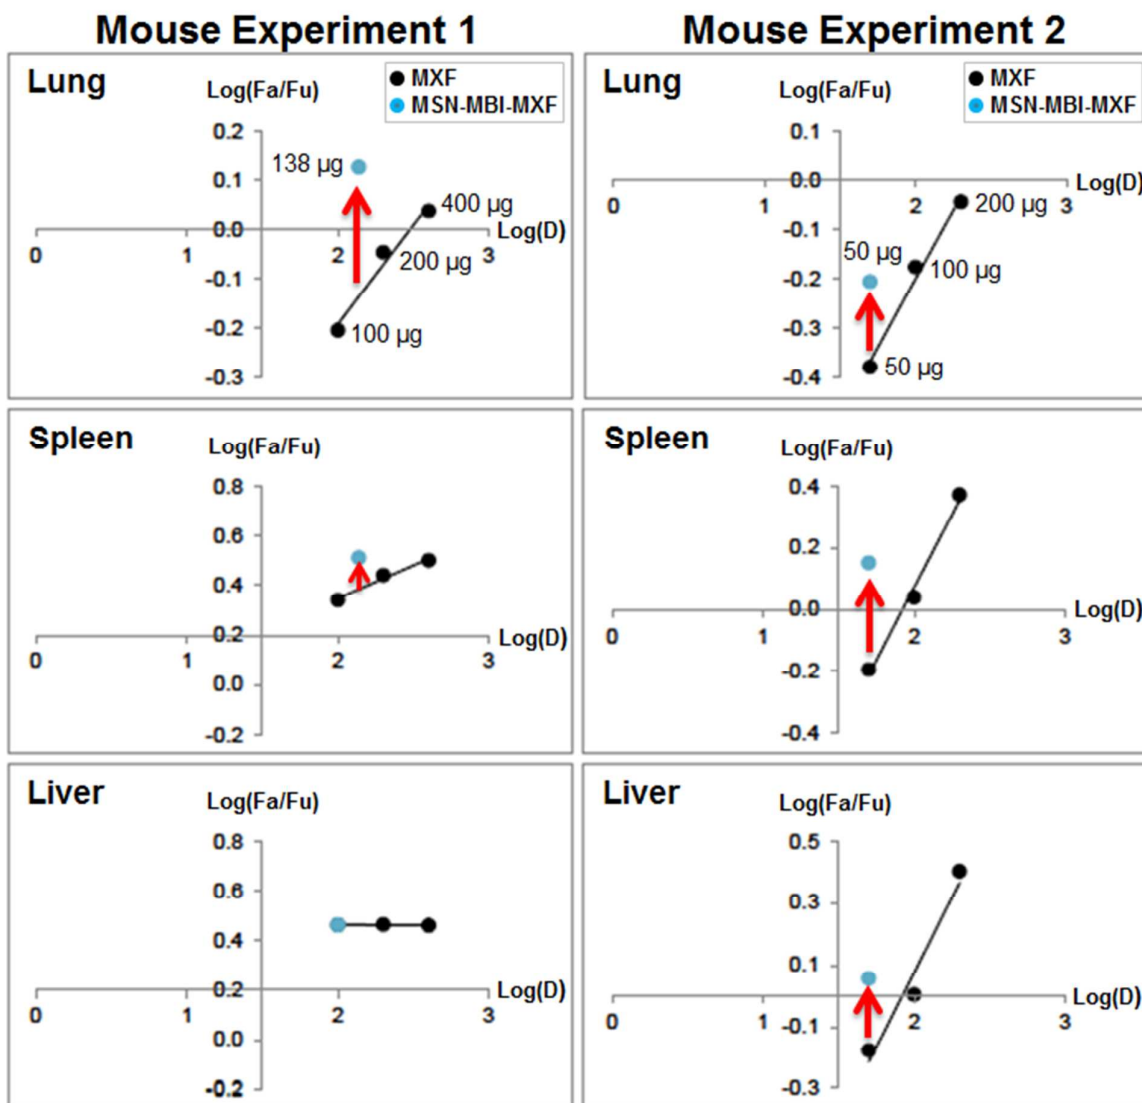

**Figure S6.** Median-effect plots to compare efficacy of MSN-MBI-MXF with MXF administered as free drug. The efficacy of MSN-MBI-MXF in the lung, spleen, and liver was compared with that of free MXF in a median-effect plot of the results of mouse Experiments 1 and 2. For a given dose of MXF, an upward shift as indicated by the red arrows on the y-axis indicates greater *F. tularensis* killing efficacy of the MSN-MBI-MXF. Fa: Fraction of bacteria killed; Fu: Fraction of bacteria surviving; D: Dose of MXF in micrograms.

**Table S1.** Bacterial CFU in infected macrophages with and without treatment

| Condition                  | MXF amount  | Duration | Log CFU |
|----------------------------|-------------|----------|---------|
| No treatment               | 0 ng/ml     | 3 hours  | 5.06    |
| No treatment               | 0 ng/ml     | 1 day    | 7.60    |
| MXF                        | 1 ng/ml     | 1 day    | 7.65    |
| MXF                        | 2 ng/ml     | 1 day    | 7.59    |
| MXF                        | 4 ng/ml     | 1 day    | 7.59    |
| MXF                        | 8 ng/ml     | 1 day    | 6.92    |
| MXF                        | 16 ng/ml    | 1 day    | 5.09    |
| MXF                        | 32 ng/ml    | 1 day    | 3.72    |
| MXF                        | 64 ng/ml    | 1 day    | 3.43    |
| MSN-MBI control (8 µg/ml)  | 0 ng/ml     | 1 day    | 7.72    |
| MSN-MBI-MXF (0.0625 µg/ml) | 1.65 ng/ml  | 1 day    | 7.59    |
| MSN-MBI-MXF (0.125 µg/ml)  | 3.3 ng/ml   | 1 day    | 7.21    |
| MSN-MBI-MXF (0.25 µg/ml)   | 6.6 ng/ml   | 1 day    | 5.49    |
| MSN-MBI-MXF (0.5 µg/ml)    | 13.2 ng/ml  | 1 day    | 4.49    |
| MSN-MBI-MXF (1 µg/ml)      | 26.4 ng/ml  | 1 day    | 4.23    |
| MSN-MBI-MXF (2 µg/ml)      | 52.8 ng/ml  | 1 day    | 3.49    |
| MSN-MBI-MXF (4 µg/ml)      | 105.6 ng/ml | 1 day    | 3.49    |
| MSN-MBI-MXF (8 µg/ml)      | 211.2 ng/ml | 1 day    | 1.73    |
| MSN-ANA control (8 µg/ml)  | 0 ng/ml     | 1 day    | 7.70    |
| MSN-ANA-MXF (0.0625 µg/ml) | 0.23 ng/ml  | 1 day    | 7.71    |
| MSN-ANA-MXF (0.125 µg/ml)  | 0.45 ng/ml  | 1 day    | 7.72    |
| MSN-ANA-MXF (0.25 µg/ml)   | 0.9 ng/ml   | 1 day    | 7.59    |
| MSN-ANA-MXF (0.5 µg/ml)    | 1.8 ng/ml   | 1 day    | 7.59    |
| MSN-ANA-MXF (1 µg/ml)      | 3.6 ng/ml   | 1 day    | 7.43    |
| MSN-ANA-MXF (2 µg/ml)      | 7.2 ng/ml   | 1 day    | 7.06    |
| MSN-ANA-MXF (4 µg/ml)      | 14.4 ng/ml  | 1 day    | 5.34    |
| MSN-ANA-MXF (8 µg/ml)      | 28.8 ng/ml  | 1 day    | 3.61    |
